# Supplementary material for: The Effects of Soft-Tissue Techniques and Exercise in the Treatment of Patellar Tendinopathy—Systematic Review and Meta-Analysis
Source: MDPI journal article supplement (doi:10.3390/healthcare12040427), 2024-02-07
Supplement: s1 [file s1]

## Supplementary material S1. search strategies

### Pubmed

("Patellar Ligament"[Mesh] AND "Exercise Therapy"[Mesh] AND ("Musculoskeletal Manipulations"[Mesh] OR "Acupuncture Therapy"[Mesh] OR "Muscle Stretching Exercises"[Mesh] OR "Electrolysis"[Mesh])) OR (("Patellar Ligament"[tw] OR "Patellar tendinopathy"[tw]) AND "Exercise Therapy"[tw] AND ("Musculoskeletal Manipulations"[tw] OR "Acupuncture Therapy"[tw] OR "dry needling" [tw]) OR ("Muscle Stretching Exercises"[tw] OR stretching[tw])OR ("Electrolysis"[tw] OR EPI[tw] OR "intratissue percutaneous electrolysis" [tw]) ) ) AND random\*)

### Lilacs, IBECs

mh:("Patellar Ligament" AND "Exercise Therapy" AND ("Musculoskeletal Manipulations" OR "Acupuncture Therapy" OR "Muscle Stretching Exercises" OR "Electrolysis")) OR  
Tw:(("Patellar Ligament" OR "Patellar tendinopathy") AND "Exercise Therapy" AND ("Musculoskeletal Manipulations" OR ("Acupuncture Therapy" OR "dry needling" ) OR ("Muscle Stretching Exercises" OR stretching)OR ("Electrolysis" OR EPI OR "intratissue percutaneous electrolysis" ) ) )

### Cochrane Library

|     |                                                                     |       |
|-----|---------------------------------------------------------------------|-------|
| #1  | ("patellar ligament"):ti,ab,kw (Word variations have been searched) | 334   |
| #2  | ("exercise therapy"):ti,ab,kw (Word variations have been searched)  | 14652 |
| #3  | (manipulation):ti,ab,kw (Word variations have been searched)        | 14151 |
| #4  | ("acupuncture"):ti,ab,kw (Word variations have been searched)       | 17655 |
| #5  | (stretching):ti,ab,kw (Word variations have been searched)          | 9244  |
| #6  | (electrolysis):ti,ab,kw (Word variations have been searched)        | 105   |
| #7  | MeSH descriptor: [Patellar Ligament] explode all trees              | 165   |
| #8  | MeSH descriptor: [Exercise Therapy] explode all trees               | 16556 |
| #9  | MeSH descriptor: [Musculoskeletal Manipulations] explode all trees  | 3396  |
| #10 | MeSH descriptor: [Acupuncture Therapy] explode all trees            | 5394  |
| #11 | MeSH descriptor: [Muscle Stretching Exercises] explode all trees    | 700   |
| #12 | MeSH descriptor: [Electrolysis] explode all trees                   | 21    |

#13    (#1 AND #2 AND (#3 OR #4 OR #5 OR #6)) OR (#7 AND #8 AND (#9 OR #10 OR #11 OR #12))    3

### **Academic Search Complete, CINAHL, SportDiscus (EBSCOHost)**

((("Patellar Ligament" OR "Patellar tendinopathy") AND "Exercise Therapy" AND ("Musculoskeletal Manipulations" OR ("Acupuncture Therapy" OR "dry needling" ) OR ("Muscle Stretching Exercises" OR stretching)OR ("Electrolysis" OR EPI OR "intratissue percutaneous electrolysis" ) )) OR MH("Patellar Ligament" AND "Exercise Therapy" AND ("Musculoskeletal Manipulations" OR "Acupuncture Therapy" OR "Muscle Stretching Exercises" OR "Electrolysis"))

### **Scielo, WOS Core Collection (Web of Science)**

TS=((("Patellar Ligament" OR "Patellar tendinopathy") AND "Exercise Therapy" AND ("Musculoskeletal Manipulations" OR ("Acupuncture Therapy" OR "dry needling" ) OR ("Muscle Stretching Exercises" OR stretching)OR ("Electrolysis" OR EPI OR "intratissue percutaneous electrolysis" ) ))

### **Pedro**

Patellar tendinopathy AND exercise AND Musculoskeletal Manipulations

Patellar tendinopathy AND exercise AND acupuncture

Patellar tendinopathy AND exercise AND stretching

Patellar tendinopathy AND exercise AND electrolysis

### **Google scholar**

patellar tendinopathy AND soft tissue AND exercise therapy AND pain AND function AND random \*
