# Supplementary material for: The Effects of Soft-Tissue Techniques and Exercise in the Treatment of Patellar Tendinopathy—Systematic Review and Meta-Analysis
Source: MDPI journal article supplement (doi:10.3390/healthcare12040427), 2024-02-07
Supplement: s1 [file s1]

## Supplementary Material S2: Characteristics of the intervention

| Author                           | Groups | Intervention                                                                                                                                                                      | Structure                              | Intensity            | Reps/sets                                                                                                     | Frequency         | Duration |
|----------------------------------|--------|-----------------------------------------------------------------------------------------------------------------------------------------------------------------------------------|----------------------------------------|----------------------|---------------------------------------------------------------------------------------------------------------|-------------------|----------|
| <i>Dimitrios et al.<br/>2012</i> | ET+ES  | <ul style="list-style-type: none"> <li>• Static stretching</li> <li>• Single-leg squat on a 25° inclined plane</li> </ul>                                                         | Quadriceps muscle and patellar tendon. | No pain, little pain | <ul style="list-style-type: none"> <li>• 30"</li> <li>• 1' rest</li> <li>• 3x15</li> <li>• 2' rest</li> </ul> | 5 times/wk        | 4 weeks  |
|                                  | GC     | <ul style="list-style-type: none"> <li>• Single-leg squat on a 25° inclined plane</li> </ul>                                                                                      |                                        |                      | <ul style="list-style-type: none"> <li>• 3x15</li> <li>• 2' rest</li> </ul>                                   |                   |          |
| <i>Dragoo et al.<br/>2014</i>    | DN     | <ul style="list-style-type: none"> <li>• Eco-guided dry needling</li> <li>• 5-phase eccentric exercise program</li> </ul>                                                         | Quadriceps muscle and patellar tendon. | n/m                  | <ul style="list-style-type: none"> <li>• 10 punctures</li> <li>• n/m</li> </ul>                               | n/m<br>2 times/wk | 12 weeks |
|                                  | GC*    | <ul style="list-style-type: none"> <li>• 5-phase eccentric exercise program</li> </ul>                                                                                            |                                        |                      | n/m                                                                                                           | 2 times/wk        |          |
| <i>Jadhav et al.<br/>2014</i>    | MFT    | <ul style="list-style-type: none"> <li>• Transverse friction massage</li> <li>• Quadriceps and hamstring stretching</li> <li>• Bilateral squat with 25° inclined plane</li> </ul> | Quadriceps muscle and patellar tendon. | n/m                  | <ul style="list-style-type: none"> <li>• 10'</li> <li>• 3x20"</li> <li>• 3x15</li> </ul>                      | 5 times/wk        | 12 weeks |
|                                  | GC     | <ul style="list-style-type: none"> <li>• Cryotherapy</li> <li>• Quadriceps and hamstring stretching</li> <li>• Bipodal squat with a 25° inclined plane</li> </ul>                 |                                        |                      | <ul style="list-style-type: none"> <li>• 10'</li> <li>• 3x20"</li> <li>• 3x15</li> </ul>                      | 5 times/wk        |          |

| Author                            | Groups | Intervention                                                                                                                                                               | Structure                              | Intensity               | Reps/sets                                                                             | Frequency                      | Duration |
|-----------------------------------|--------|----------------------------------------------------------------------------------------------------------------------------------------------------------------------------|----------------------------------------|-------------------------|---------------------------------------------------------------------------------------|--------------------------------|----------|
| <i>Abat et al.<br/>2016</i>       | EPI    | <ul style="list-style-type: none"> <li>Eco-guided EPI</li> <li>Single-leg squat on a 25° inclined plane</li> </ul>                                                         | Quadriceps muscle and patellar tendon. | 2 mA<br>n/m             | <ul style="list-style-type: none"> <li>3 punctures</li> <li>3x15,3' rest</li> </ul>   | every 2 weeks<br>3 times/wk    | 8 weeks  |
|                                   | GC**   | <ul style="list-style-type: none"> <li>Single-leg squat on a 25° inclined plane</li> </ul>                                                                                 |                                        | n/m                     | <ul style="list-style-type: none"> <li>3x15,3' rest</li> </ul>                        | 3 times/wk                     |          |
| <i>López-Royo et al.<br/>2021</i> | DN     | <ul style="list-style-type: none"> <li>Eco-guided dry needling</li> <li>Single-leg squat on a 25° inclined plane</li> </ul>                                                | Quadriceps muscle and patellar tendon. | n/m<br>pain 5/10        | <ul style="list-style-type: none"> <li>3 punctures of 3"</li> <li>3x15</li> </ul>     | every 2 weeks<br>2 times a day | 8 weeks  |
|                                   | EPI    | <ul style="list-style-type: none"> <li>Eco-guided EPI</li> <li>Single-leg squat on a 25° inclined plane</li> </ul>                                                         |                                        | 3mA<br>pain 5/10        | <ul style="list-style-type: none"> <li>1 punctures of 3"</li> <li>3x15</li> </ul>     | every 2 weeks<br>2 times a day |          |
|                                   | GC     | <ul style="list-style-type: none"> <li>Single-leg squat on a 25° inclined plane</li> </ul>                                                                                 |                                        | pain 5/10               | <ul style="list-style-type: none"> <li>3x15</li> </ul>                                | 2 times a day                  |          |
| <i>Sharif et al.<br/>2023</i>     | DN     | <ul style="list-style-type: none"> <li>Eco-guided dry needling</li> <li>Bilateral and unilateral squat with 25° inclined plane plus conventional physiotherapy.</li> </ul> | Quadriceps muscle and patellar tendon. | No pain,<br>little pain | <ul style="list-style-type: none"> <li>20-30 punctures of 3"</li> <li>3x15</li> </ul> | 2 times/wk                     | 4 weeks  |
|                                   | GC     | <ul style="list-style-type: none"> <li>Bilateral and unilateral squat with 25° inclined plane plus conventional physiotherapy.</li> </ul>                                  |                                        |                         | <ul style="list-style-type: none"> <li>3x15</li> </ul>                                |                                |          |

**DN:** Dry needling; **EPI:** Percutaneous Electrolysis Guided by Ultrasound; **ES:** Stretching; **ET:** Therapeutic Exercise; **GC:** Control Group; **MFT:** transverse friction massage; **n/m:** not mentioned; \*6 ml of leukocyte-rich PRP was also applied; \*\*ultrasound, laser, and interferential current were also applied.
